# Supplementary material for: The human RecQ helicases BLM and RECQL4 cooperate to preserve genome stability
Source: PubMed Central journal article supplement — Nucleic Acids Res. 2012 Apr 28;40(14):6632–48. doi: 10.1093/nar/gks349 (PMC3413146; doi:10.1093/nar/gks349), 2012-04-28
Supplement: supp_gks349_DK_NARFinal_revised_supplementary_fig.pdf [file supp_gks349_DK_NARFinal_revised_supplementary_fig.pdf]

## Supplementary Material and Methods 1

### Strand exchange assay:

The synthetic stalled replication fork substrate was prepared according to a previously published procedure (35). In brief, partial duplex B was prepared by annealing 5'-radiolabeled ( $\gamma$ -<sup>32</sup>ATP) oligonucleotide as shown (Figure 4D). Then, it was incubated with strand A and BLM in annealing buffer (30 mM Tris pH 7.4, 50 mM KCl, 10 mM MgCl<sub>2</sub>, 1 mM DTT, 0.1 mg/ml BSA) at 37 °C to get substrate C in a 100  $\mu$ l reaction volume in two separate vials. After 10 minutes 10  $\mu$ l aliquots were taken out and mixed with stop buffer. Then 2 mM ATP and RECQL4 were added to it. Again, 10  $\mu$ l aliquots were taken out at 1, 2, 4, 8 and 16 minutes from each reaction and mixed with stop buffer. The products were separated by 8% non-denaturing PAGE. The radiolabeled DNA was analyzed by phosphorImager and analyzed by ImageQuant software (GE healthcare, Piscataway, NJ, USA).

Supplementary Figure S1

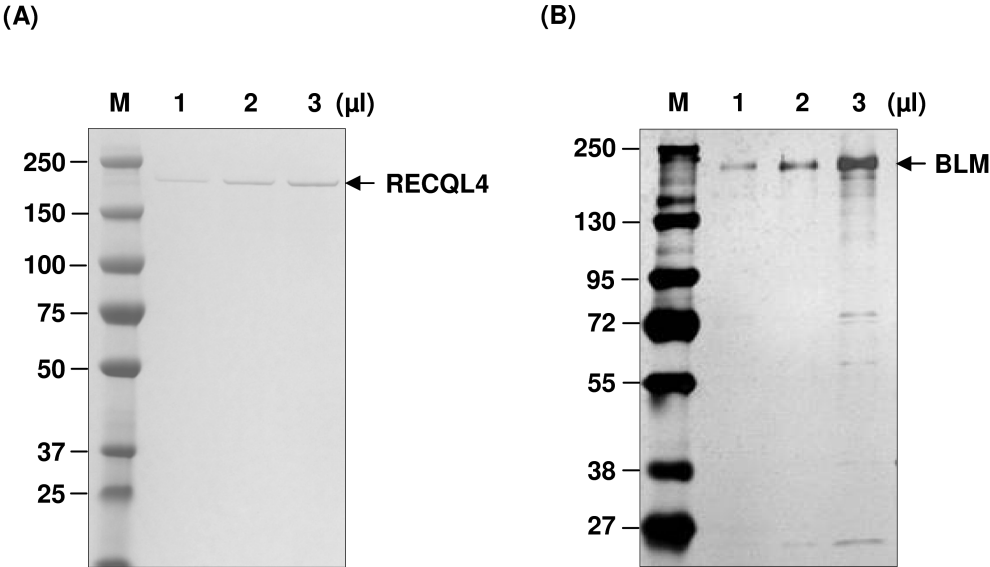

Suppl. Fig S1: (A) Coomassie stained gel of purified His tagged recombinant RECQL4 protein from *E. coli*. (B) Silver stained gel of purified His tagged recombinant BLM protein from *S. cereviceae*. M= Marker.

Supplementary Figure S2

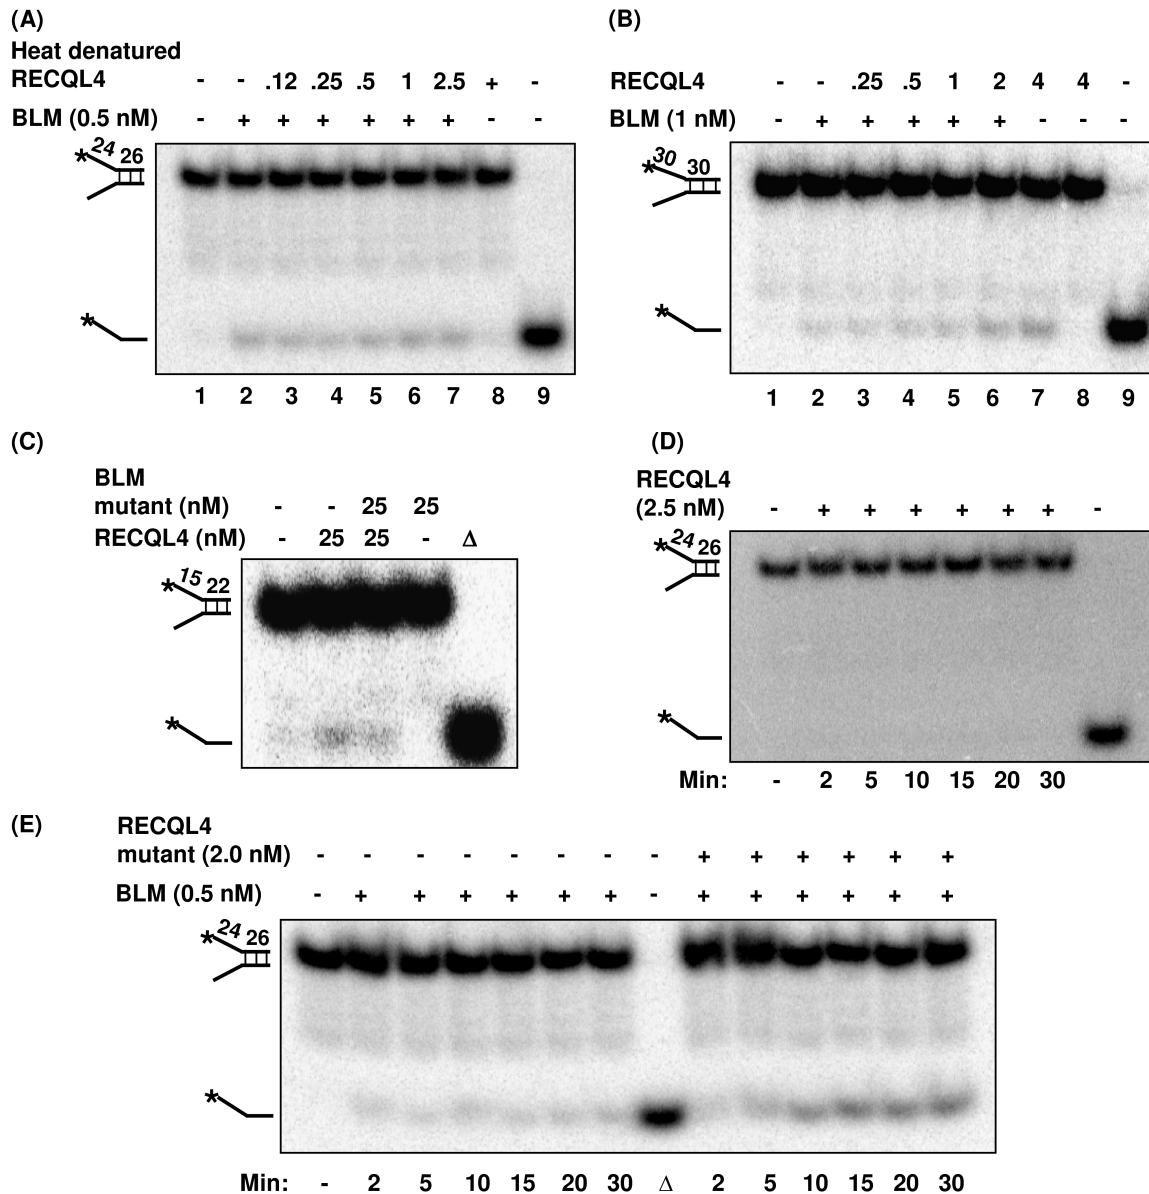

Suppl. Fig. S2: (A) The BLM unwinding activity in presence of increasing concentrations of heat denatured RECQL4. (B) The stimulation of BLM helicase activity in the presence of increasing concentrations of wild type RECQL4 (lanes 3-7) on 30-mer fork DNA duplex substrate. Helicase activities of BLM or RECQL4 alone are shown in lane 2 and 8, respectively. Substrate alone and heat denatured substrate are shown in lanes 1 and 9, respectively. (C) Unwinding activity of RECQL4 on 22-mer DNA duplex substrate in the absence or the presence of helicase-dead mutant BLM protein. (D) Time course kinetics of RECQL4 unwinding activity at different time points as indicated on DNA fork substrate. (E) Time course kinetics of BLM unwinding activity in the absence or the presence of RECQL4 helicase-dead mutant protein on DNA fork substrate.

Supplementary Figure S3

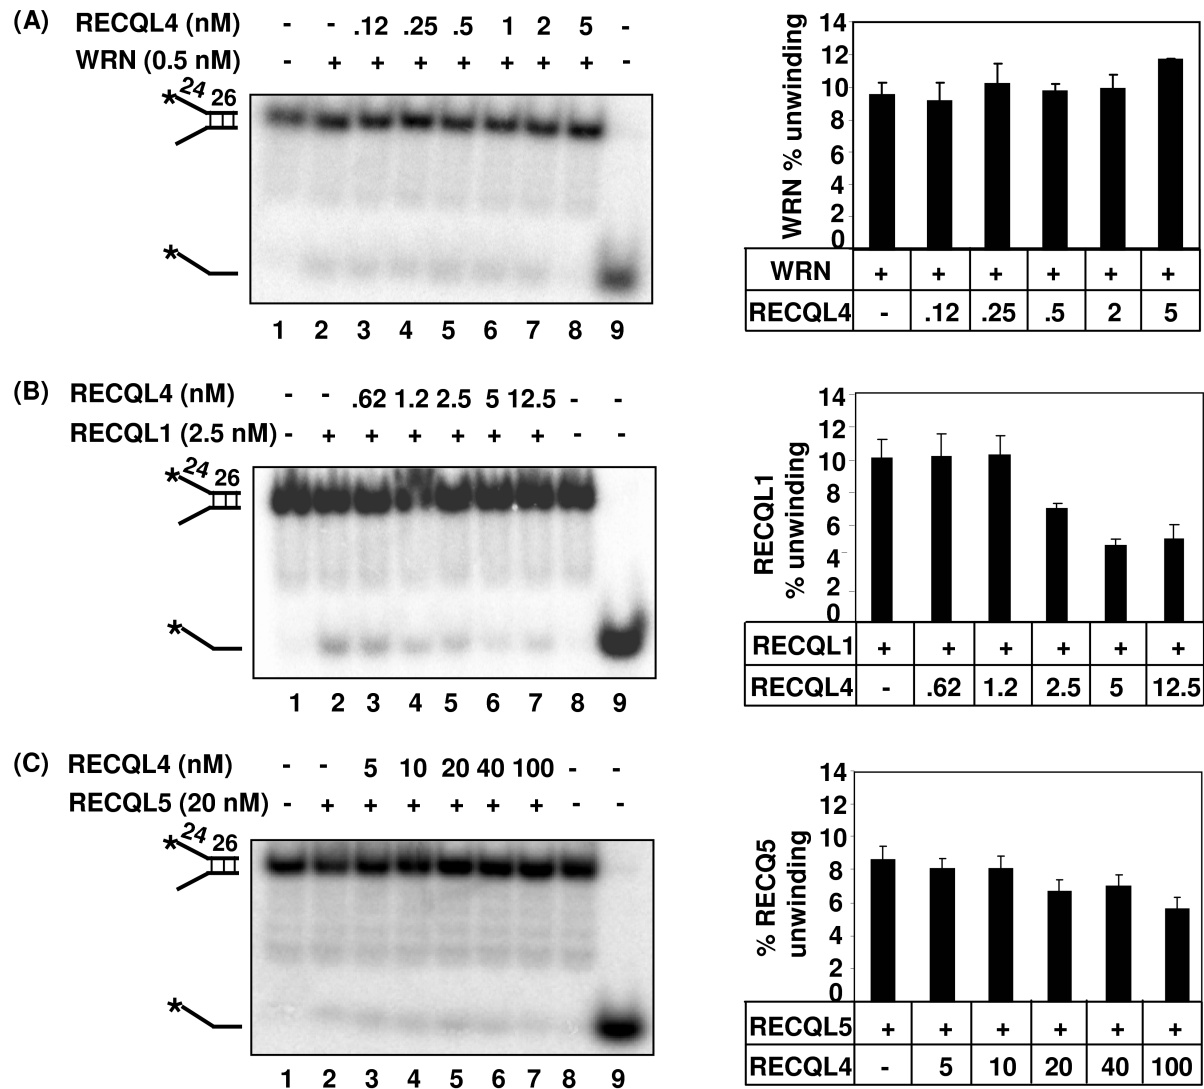

Suppl. Fig. S3. The unwinding activities of different RecQ helicase members (WRN, RECQL1 and RECQL5) as indicated in the absence or the presence of increasing concentrations of RECQL4 are shown in panels (A), (B), and (C) as indicated. The molar ratios of RECQL4 with respect to different RecQ helicases are indicated for each lane. The bar graph is represented along each panels. The experiments were performed in triplicate and the error bars represent the standard deviation (+/-).

Supplementary Figure S4

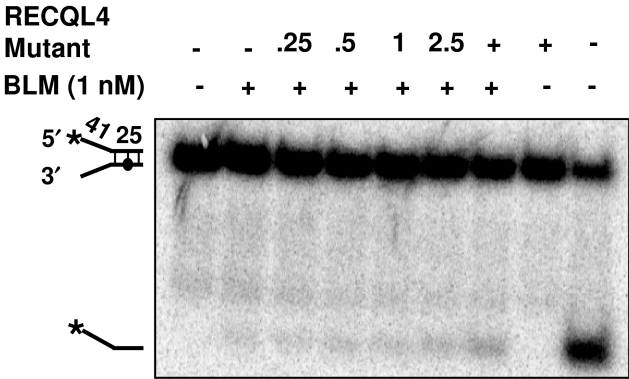

Suppl. Fig. S4. BLM unwinding activity in presence of increasing concentrations of RECQL4 helicase-dead mutant protein on 8-oxoG lesion containing DNA fork substrate.

**Supplementary Figure S5**

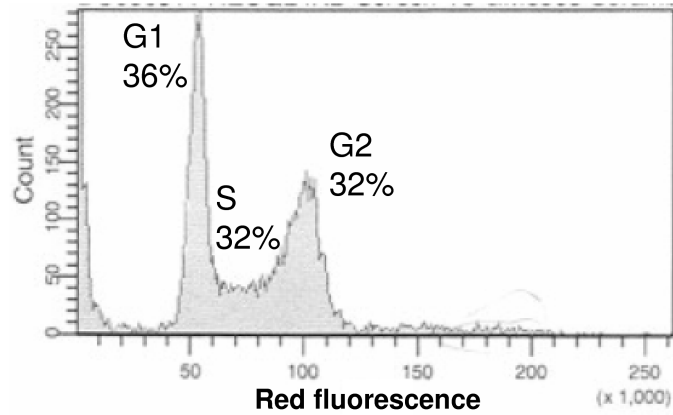

**GM 08505 scrambled cells**

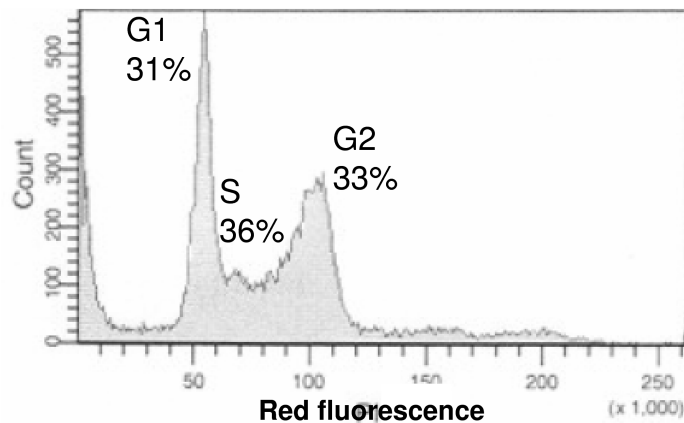

**GM 08505 RECQL4 KD cells**

Suppl. Fig. S5: Cell cycle analysis of BLM-deficient cells and BLM- and RECQL4-double deficient cells. Cells were transduced with a lentiviral vector encoding scrambled shRNA or RECQL4 shRNA and harvest 6 days post transduction for analysis. The cells were fixed in acetone: methanol (1:1) and followed by staining with propidium iodide (PI) for FACS analysis.

Supplementary Figure S6

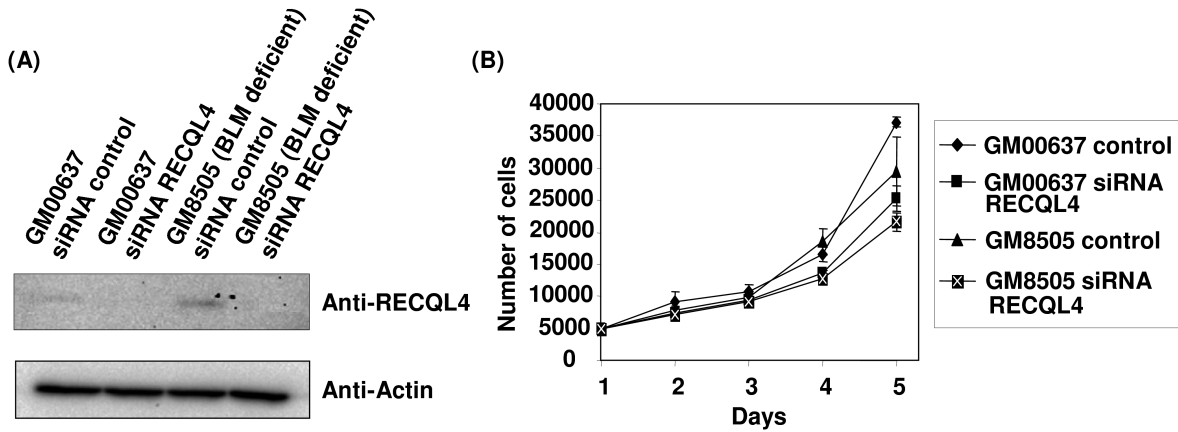

(C) Quantification of SCE frequencies of GM00637 and GM08505 (BLM) cells transfected with either control or the siRNA targeted against RECQL4

| Cell line        | Number of SCEs/chromosome |    |    |    |    |   |   |   |   |   | SCEs Chromosome | SCEs/Chromosome |      |
|------------------|---------------------------|----|----|----|----|---|---|---|---|---|-----------------|-----------------|------|
|                  | 0                         | 1  | 2  | 3  | 4  | 5 | 6 | 7 | 8 | 9 |                 |                 |      |
| GM637 control    | 239                       | 59 | 15 |    |    |   |   |   |   |   | 89              | 313             | 0.28 |
| GM637 RECQL4 KD  | 215                       | 46 | 12 | 2  |    |   |   |   |   |   | 76              | 275             | 0.27 |
| GM8505 control   | 156                       | 92 | 95 | 39 | 14 | 4 |   | 1 |   |   | 482             | 401             | 1.20 |
| BLM-/- RECQL4 KD | 88                        | 44 | 71 | 35 | 13 | 7 | 4 | 1 |   |   | 409             | 263             | 1.55 |

Suppl. Fig S6. (A) Western blot showing RECQL4 silencing in normal fibroblasts (GM00637) and BLM-deficient fibroblasts (GM08505) using siRNA targeted against RECQL4, 48 hrs after transfection. (B) The graph represents the growth assay of various control and RECQL4 knock down cells as indicated. (C) Quantification of frequencies of SCEs/chromosome in different cell lines transfected with either the control or the siRNA targeted against RECQL4 in normal fibroblasts and BLM deficient fibroblasts.

Supplementary Table 1:

Oligonucleotide substrate used in this study

TG, thymine glycol; 8-oxo-G, 8-oxoguanine; T- translocating strand; N- non translocating strand.

| DNA substrate                    | Structure                                                                           | Sequence                                                                                                                                                                                                                                                                                         | Reference             |
|----------------------------------|-------------------------------------------------------------------------------------|--------------------------------------------------------------------------------------------------------------------------------------------------------------------------------------------------------------------------------------------------------------------------------------------------|-----------------------|
| Fork substrate<br>(26 bp duplex) | 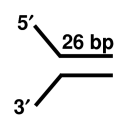   | 5'- GGGACGCGTCGGCCTGGCACGTCGGCCGCTGCGGCCAGGCACCCGATGGC - 3'<br>3'- C CCTGCGCAGCCGGACCGTGCAGCCGTTTGTGTTGTTGTTT - 5'                                                                                                                                                                               |                       |
| Fork control<br>(25 bp duplex)   |    | TTTTTTTTTTTTTTTTGACGCTGCCGAATTCTGGCCCAAGCGGACATCTTAGCCACGTTGACCCT<br>TTTTTTTTTTTTTTTTTGCAGTATCTGCTAATGTAACGATCCTGTAGAATCGGGTGCAACTGGGA                                                                                                                                                           | Suhasini et al., 2010 |
| TG-T                             |   | TTTTTTTTTTTTTTTTGACGCTGCCGAATTCTGGCCCAAGCGGACATCTTAGCCACGTTGACCCT<br>TTTTTTTTTTTTTTTTTGCAGTATCTGCTAATGTAACGATCCTGTAGAATCGGGTGCAACTGGGA <sub>g</sub>                                                                                                                                              | Suhasini et al., 2010 |
| TG-N                             |  | TTTTTTTTTTTTTTTTGACGCTGCCGAATTCTGGCCCAAGCGGACATCTTTgGCCACGTTGACCCT<br>TTTTTTTTTTTTTTTTTGCAGTATCTGCTAATGTAACGATCCTGTAGAAA CGGGTGCAACTGGGA                                                                                                                                                         | Suhasini et al., 2010 |
| 8-oxoG-T                         |  | TTTTTTTTTTTTTTTTGACGCTGCCGAATTCTGGCCCAAGCGGACATCTTTGCCACGTTGACCCT<br>TTTTTTTTTTTTTTTTTGCAGTATCTGCTAATGTAACGATCCTGTAGAAACGGGTGCAACTGGGA <sub>8oxo</sub>                                                                                                                                           | Suhasini et al., 2010 |
| 8-oxoG-N                         |  | TTTTTTTTTTTTTTTTGACGCTGCCGAATTCTGGCCCAAGCGGACATCTTAGCCACGTTGACCCT<br>TTTTTTTTTTTTTTTTTGCAGTATCTGCTAATGTAACGATCCTGTAGAATCGGGTGCAACTGGGA <sub>8oxo</sub>                                                                                                                                           | Suhasini et al., 2010 |
| G4-quadruplex                    |  | 5' - TGGACCAGACCTAGCAGCTATGGGGGAGCTGGGGAAGGTGGGAATGTGA - 3'                                                                                                                                                                                                                                      | Sun et al., 1998      |
| HJ substrate                     |  | HJ X12-1: 5' - GACGCTGCCGAATTCTGGCTTGTAGGACATCTTGCCACGTTGACCCG - 3'<br>HJ X12-2: 5' - CGGGTCAACGTGGGCAAAGATGTCCTAGCAATGTAATCGTCTATGACGTC - 3'<br>HJ X12-3: 5' - GACGTCATAGACGATTACATTGCTAGGACATGCTGTCTAGAGACTATCGC - 3'<br>HJ X12-4: 5' - GCGATAGTCTCTAGACAGCATGTCTAGCAAGCCAGAATTCGGCAGCGTC - 3' | Karow et al., 2000    |



Supplementary Table 1 cont. :

| DNA substrate            | Structure                                                                                                        | Sequence                                                                                                                                                                                                                                                                                                                                                                                                                                                   | Reference              |
|--------------------------|------------------------------------------------------------------------------------------------------------------|------------------------------------------------------------------------------------------------------------------------------------------------------------------------------------------------------------------------------------------------------------------------------------------------------------------------------------------------------------------------------------------------------------------------------------------------------------|------------------------|
| Telomeric D-loop         |                                                                                                                  | 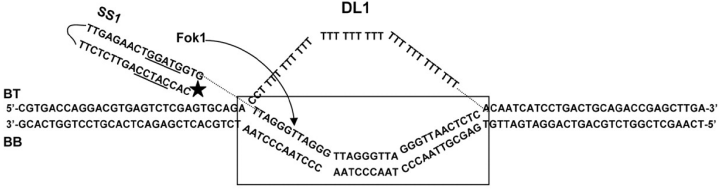 <p>BT<br/>5'-CGTGACCAGGACGTGAGTCTCGAGTGCAGA<br/>3'-GCACGGTCTCGACTCAGAGCTCACGTC</p> <p>SS1<br/>TTGAGAACTGGATGGTG<br/>TTCTCTTGACCTACCACT</p> <p>Fok1</p> <p>DL1<br/>TTT TTT TTT TTT TTT TTT TTT</p> <p>BB<br/>AATCCCAATCCC AATCCCAAT CCCAATTGCGAG<br/>TTAGGGTTAGGG TTAGGGTTA GGGTTAACTCTC<br/>ACAATCATCCTGACTGCAGACCCGAGCTTGA-3'<br/>TGTAGTAGGACTGACGCTGGCTCGAACT-5'</p> | Opresko et al., 2004   |
| Stalled replication fork |  <p>30 bp<br/>30 nt<br/>C</p> | <p>A: 5'- GAGGTCCTCCAGTGAATTCGAGCTCGCAGCCCTCTAGGTTACATGACTGAATGATAGT- 3'</p> <p>B: 5'- ACTATCATTCAAGTCATGTAACCTAGTCAATCTGCGAGCTCGAATTCCTGGAGTGACCTC- 3'</p> <p>C: 5'- ATTGACTAGGTTACATGACTGAATGATAGT- 3'</p>                                                                                                                                                                                                                                               | Kanagaraj et al., 2006 |
